# Supplementary material
Source: Springer Nature journal article supplement (https://www.springermedizin.de/resource/supplementary/12891_2007_373_MOESM1_ESM.pdf/9511178)
Supplement: MOESM1 [file 9511178]

Telephone screening

Ineligible  
Fail inclusion criteria  
Meet exclusion criteria

Xray and clinical  
screening

Ineligible  
Fail inclusion criteria  
Meet exclusion criteria

**0 weeks** Consent, baseline assessment and  
randomisation (n=200)

Lateral wedged  
insoles

Control flat  
insoles

**Monthly** Logbooks posted back to blinded assessor

**12 months** Final assessment
